# Supplementary material for: Quaternary ammonium functionalized Fe3O4@P(GMA–EGDMA) composite particles as highly efficient and dispersible catalysts for phase transfer reactions
Source: Royal Society of Chemistry journal article supplement (doi:10.1039/c5ra09088a), 2015-01-01
Supplement: c5ra09088a1.pdf [file c5ra09088a1.pdf]

## Quaternary ammonium functionalized Fe<sub>3</sub>O<sub>4</sub>@P(GMA-EGDMA) composite particles as high efficiency and dispersibility catalysts for phase transfer reaction

Xiangkun Jia<sup>a</sup>, Xinlong Fan<sup>a</sup>, Yin Liu<sup>a</sup>, Wei Li<sup>a</sup>, Lei Tian<sup>a</sup>, Lili Fan<sup>a</sup>, Baoliang Zhang<sup>a</sup>, Hepeng Zhang<sup>a</sup> and Qiyu Zhang<sup>\*a</sup>

Table S1. The detailed experimental conditions of the preparation of Fe<sub>3</sub>O<sub>4</sub>@P(GMA-EGDMA) particles

| Entr | MPS modified Fe <sub>3</sub> O <sub>4</sub> (g) | GMA(g) | EGDMA(g) | CTAB(g) | V-50(g) | EtOH(mL) | H <sub>2</sub> O(mL) |
|------|-------------------------------------------------|--------|----------|---------|---------|----------|----------------------|
| Y    |                                                 |        |          |         |         |          |                      |
| 1    | 0.05                                            | 0.2    | 0.02     | 0.02    | 0.02    | 8        | 60                   |
| 2    | 0.05                                            | 0.4    | 0.04     | 0.02    | 0.02    | 8        | 60                   |
| 3    | 0.05                                            | 0.6    | 0.06     | 0.02    | 0.02    | 8        | 60                   |
| 4    | 0.05                                            | 0.8    | 0.08     | 0.02    | 0.02    | 8        | 60                   |
| 5    | 0.05                                            | 1.0    | 0.10     | 0.02    | 0.02    | 8        | 60                   |

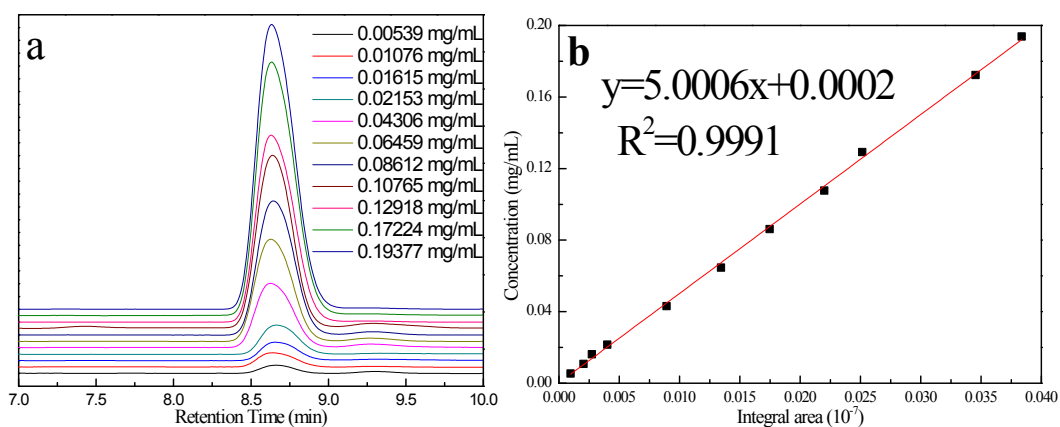

Fig. S1. (a) The curves of different concentrations of dibenzyl ether measured by HPLC; (b) the standard curve of concentration of dibenzyl ether vs. integral area measured by HPLC.

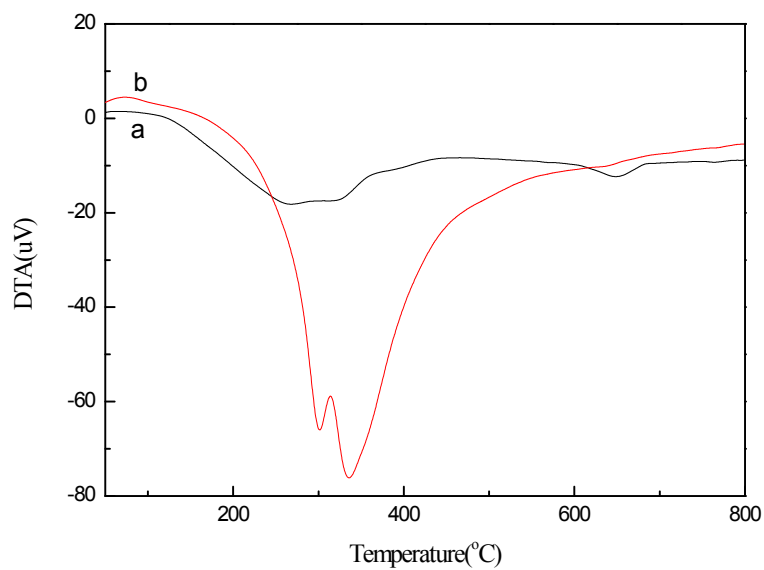

Fig. S2. The DTA curves of  $\text{Fe}_3\text{O}_4$  (a) and  $\text{Fe}_3\text{O}_4@\text{PGMA}$ (b).

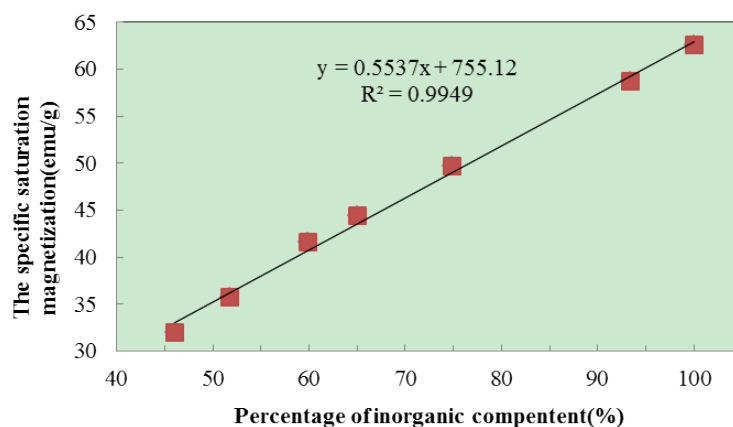

Fig. S3. The linear relationship between the percentages of inorganic component and the specific saturation magnetizations.

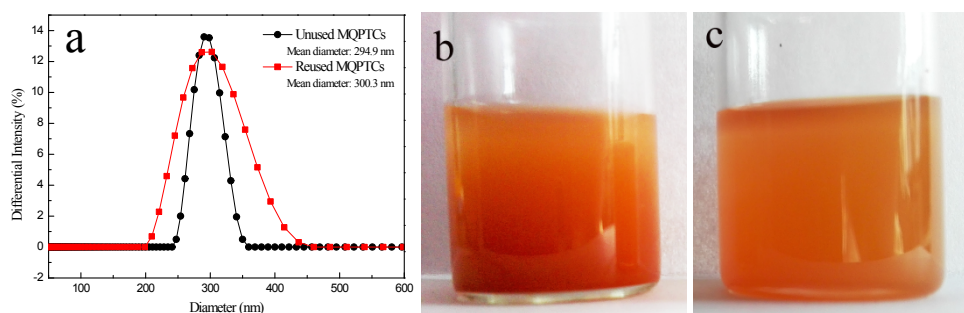

Fig. S4. (a) The particle size distributions of unused MQPTCs and MQPTCs reused for 8 times; Photographs of MQPTCs(b) and MQPTCs reused for 8 times(c) dispersed in water after standing for 6 h.
